# Supplementary material
Source: ML conference proceedings conference paper supplement (https://proceedings.mlr.press/v97/ochs19a.html)
Supplement: Supplementary file [file ochs19a-supp.pdf]

---

# Model Based Conditional Gradient Method with Armijo-like Line Search

## — Supplementary Material —

---

### A. Proofs

#### A.1. Proof of Proposition 3.3

For a fixed  $k \in \mathbb{N}$ , we abbreviate  $\gamma = \gamma_k$ . Using Assumption 2, we have

$$f(x_{k+1}) - f(x_k) \leq f_{x_k}(x_{k+1}) - f_{x_k}(x_k) + \omega(\|x_{k+1} - x_k\|).$$

From  $\|x_{k+1} - x_k\| = \gamma\|y_k - x_k\|$  and the definition of a growth function it follows that  $\omega(\|x_{k+1} - x_k\|) = o(\gamma)$ . The convexity of the model function  $f_{x_k}$  gives us

$$f_{x_k}(x_{k+1}) - f_{x_k}(x_k) \leq \gamma(f_{x_k}(y_k) - f_{x_k}(x_k)).$$

Now, we argue by contradiction. Suppose that for any  $\tilde{\gamma} > 0$  there exists  $\gamma \in (0, \tilde{\gamma})$  such that (ALS) does not hold, which yields the following calculation

$$\begin{aligned} -\gamma\rho\Delta(x_k, y_k) &< f(x_{k+1}) - f(x_k) \\ &\leq \gamma(f_{x_k}(y_k) - f_{x_k}(x_k)) + o(\gamma) \\ &= -\gamma\Delta(x_k, y_k) + o(\gamma). \end{aligned}$$

Dividing the inequality by  $\gamma$ , we obtain

$$0 < (1 - \rho)\Delta(x_k, y_k) < o(\gamma)/\gamma,$$

which is a contradiction for sufficiently small  $\tilde{\gamma}$ .  $\square$

#### A.2. Proof of Proposition 3.4

The result is shown by Fermat's rule in the following lemma.

**Lemma A.1.** *Let  $\tilde{x} \in C$ . Then,*

$$\widehat{\partial}f(\tilde{x}) = \partial f_{\tilde{x}}(\tilde{x}),$$

and

$$0 \in \partial f_{\tilde{x}}(\tilde{x}) \Leftrightarrow \Delta(\tilde{x}, x) \leq 0 \quad \forall x \in C.$$

*Proof.* Let  $v \in \widehat{\partial}f(\tilde{x})$ , then

$$f(x) \geq f(\tilde{x}) + \langle v, x - \tilde{x} \rangle + o(\|x - \tilde{x}\|) \quad \forall x \in C$$

and, this implies, by the model assumption for all  $x \in C$ :

$$f_{\tilde{x}}(x) + \omega(\|x - \tilde{x}\|) \geq f_{\tilde{x}}(\tilde{x}) + \langle v, x - \tilde{x} \rangle + o(\|x - \tilde{x}\|).$$

Since  $\omega(t) = o(t)$ , we conclude that

$$f_{\tilde{x}}(x) \geq f_{\tilde{x}}(\tilde{x}) + \langle v, x - \tilde{x} \rangle + o(\|x - \tilde{x}\|), \quad \forall x \in C.$$

Now, we fix a point  $\bar{x} \in C$  and consider  $x = \bar{x} + \tau(\tilde{x} - \bar{x})$  for  $\tau \in (0, 1]$ . Then, by convexity of  $C$  and the model function  $f_{\bar{x}}$ , we obtain

$$f_{\bar{x}}(\tilde{x}) + \tau(f_{\bar{x}}(\tilde{x}) - f_{\bar{x}}(\bar{x})) \geq f_{\bar{x}}(\tilde{x}) + \tau \langle v, \bar{x} - \tilde{x} \rangle + o(\tau\|\bar{x} - \tilde{x}\|).$$

Subtracting  $f_{\bar{x}}(\tilde{x})$ , dividing by  $\tau$ , and considering  $\tau \searrow 0$ , and, using the fact that this consideration was independent of the choice of  $\bar{x}$ , we conclude that  $v \in \partial f_{\tilde{x}}(\tilde{x})$ . The converse direction follows easily.

The second part of the statement is Fermat's rule (Theorem 16.2 in (Bauschke & Combettes, 2011)) for convex functions.  $\square$

#### A.3. Proof of Theorem 3.6

We prove the result in three steps.

**Convergence of objective values.** The monotonicity and convergence of  $(f(x_k))_{k \in \mathbb{N}}$  follows directly from (ALS) and the boundedness of  $f$  from below.

**Vanishing model improvement.** From (ALS) and convergence of  $(f(x_k))_{k \in \mathbb{N}}$ , we infer that  $\gamma_k \Delta(x_k, y_k) \rightarrow 0$ , since

$$0 \leq \rho\gamma_k \Delta(x_k, y_k) \leq f(x_k) - f(x_{k+1}) \rightarrow 0.$$

We deduce boundedness of  $(\Delta(x_k, y_k))_{k \in \mathbb{N}}$  by

$$\begin{aligned} 0 &\leq \Delta(x_k, y_k) \\ &= f_{x_k}(x_k) - f_{x_k}(y_k) \leq f(x_k) - f_{x_k}(\hat{y}_k) \\ &\leq f(x_0) - f(\hat{y}_k) + \omega(\|\hat{y}_k - x_k\|) \\ &\leq f(x_0) - \inf_{x \in C} f(x) + \omega(\text{diam}(C)) < +\infty. \end{aligned}$$

Let  $\Delta^*$  be an arbitrary limit point of  $(\Delta(x_k, y_k))_{k \in \mathbb{N}}$ , that is  $\Delta(x_k, y_k) \rightarrow \Delta^*$  as  $k \xrightarrow{K} \infty$  for some  $K \subset \mathbb{N}$ , where  $k \xrightarrow{K} \infty$  abbreviates  $k \rightarrow \infty$  with  $k \in K$ .

Suppose  $\Delta^* > 0$ . Then  $\gamma_k \rightarrow 0$  as  $k \xrightarrow{K} \infty$ . For sufficiently large  $k$ , the line search procedure in Algorithm 2 reduces

$\gamma_k/\delta$  to  $\gamma_k$ , i.e., (ALS) is violated before multiplying with  $\delta$ :

$$-\frac{\gamma_k}{\delta}\rho\Delta(x_k, y_k) < f(x_k + \frac{\gamma_k}{\delta}(y_k - x_k)) - f(x_k).$$

Analogously to the proof of Proposition 3.3, we conclude

$$\begin{aligned} -\frac{\gamma_k}{\delta}\rho\Delta(x_k, y_k) &< \frac{\gamma_k}{\delta}(f_{x_k}(y_k) - f_{x_k}(x_k)) + o(\gamma_k/\delta) \\ &= -\frac{\gamma_k}{\delta}\Delta(x_k, y_k) + o(\gamma_k/\delta). \end{aligned}$$

Dividing both sides by  $\frac{\gamma_k}{\delta}$  results in  $(1 - \rho)\Delta(x_k, y_k) < o(\gamma_k)/\gamma_k$  and considering  $\gamma_k \rightarrow 0$  for  $k \xrightarrow{K} \infty$  yields a contradiction, since  $\rho \in (0, 1)$ . Therefore  $\Delta(x_k, y_k) \rightarrow 0$  for  $k \rightarrow \infty$ .

**Convergence to a stationary point.** The following relation holds for all  $x \in C$ :

$$\begin{aligned} \Delta(x_k, y_k) &= \Delta(x_k, \hat{y}_k) + f_{x_k}(\hat{y}_k) - f_{x_k}(y_k) \\ &\geq f_{x_k}(x_k) - f_{x_k}(x) - \varepsilon_k \\ &\geq f(x_k) - f(x) - \omega(\|x_k - x\|) - \varepsilon_k, \end{aligned} \quad (1)$$

where the first inequality follows from Assumption 3 and the second from Assumption 2. Taking the limit  $k \xrightarrow{K} \infty$  on both sides, using  $\Delta(x_k, y_k) \rightarrow 0$  for  $k \rightarrow \infty$ , lower semi-continuity of  $f$  and continuity of  $\omega$ , we arrive at

$$f(x) \geq f(\tilde{x}) - \omega(\|\tilde{x} - x\|), \quad \forall x \in C,$$

where  $\tilde{x} \in C$  due to compactness of  $C$ . As  $\tilde{x} \in C$  and  $\omega(t) = o(t)$ , we deduce that

$$\liminf_{\substack{x \rightarrow \tilde{x} \\ x \neq \tilde{x}}} \frac{f(x) - f(\tilde{x}) - \langle 0, x - \tilde{x} \rangle}{\|x - \tilde{x}\|} \geq 0.$$

which by definition means that  $0 \in \hat{\partial}f(\tilde{x})$ .

Moreover, using  $x = \tilde{x}$  in (1), taking the limit  $k \xrightarrow{K} \infty$  and using lower semi-continuity of  $f$ , we deduce

$$f(\tilde{x}) \geq \limsup_{k \xrightarrow{K} \infty} f(x_k) \geq \liminf_{k \xrightarrow{K} \infty} f(x_k) \geq f(\tilde{x}),$$

hence  $f(x_k) \rightarrow f(\tilde{x})$  as  $k \xrightarrow{K} \infty$ . By convergence of  $(f(x_k))_{k \in \mathbb{N}}$ , we also have  $f(x_k) \rightarrow f(\tilde{x})$  for  $k \rightarrow \infty$ .  $\square$

## References

Bauschke, H. H. and Combettes, P. L. *Convex analysis and monotone operator theory in Hilbert spaces*. Springer, 2011.
